# Supplementary material for: Organizational Risks Factors and Work-Related Musculoskeletal Disorders among Youth Welders in Informal Metalworking Setting
Source: Research Square preprint supplement (doi:10.21203/rs.3.rs-8183954/v1), 2025-12-30
Supplement: Supplementary file 1 [file c23a9e2c16b85981fc6fd99a.docx]

**Questionnaire.**

**INSTRUCTIONS.** PleaseTick (✔) the box against the preferred choice.

**SECTION A**

**SOCIO-DEMOGRAPHIC INFORMATION**

1. **What is your gender?**
   ☐ Male ☐ Female
2. **What is your age (in years)?**
   **☐** 18 - 23 ☐ 24 - 28 ☐ 29 - 35
3. **Level of education?**
   ☐ No formal education ☐ Primary education ☐ Secondary education

☐ Technical/Vocational Training ☐ Other (specify) ……………………

1. **Years of welding experience (in years)?**
   ☐ Less than 2 ☐ 3–5 ☐ 6 or over
2. **What is your employment status**

☐ Business owner ☐ Fully employed ☐ Partially employed ☐ Casual/Temporary

1. **How many hours on average do you work per day?
   ☐** Less than 6 hours ☐ 6–8 hours ☐ 9–12 hours ☐ More than 12 hours
2. **Do you sometimes do work for more hours/overtime?**

☐ Yes ☐ No

1. **Is there enough space to move freely around the workstation?**

☐ Yes ☐ No

**SECTION B**

**NORDIC MUSCULOSKELETAL QUESTIONNAIRE (NMQ)**

1. **Have you experienced body pain/discomfort or numbness in the last 12 months or in the past 7 days?** ☐ Yes ☐ No


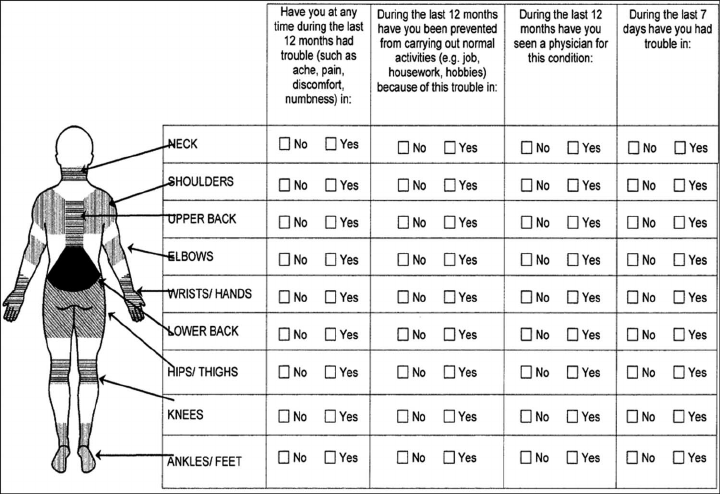
**If yes, please fill the below Nordic Musculoskeletal Questionnaire (NMQ) to the best of your knowledge. (Tick (√) where appropriate)**

1. **In your opinion, are the body pains related to your daily work activities?**

☐ Yes ☐ No.

**SECTON C**

**ORGANISATIONAL FACTORS**

1. **a) Do you take breaks at work, apart from lunch hour?**

☐ Yes ☐ No

**b) If yes, how frequently are breaks observed?**

☐ Every hour ☐ Every 2–3 hours ☐ Once per shift

**c)** **What is the approximate break duration?**

☐ Less than 5 min ☐ 5–15 min ☐ more than 15 min

1. **Are Personal Protective Equipment (PPE) available at your workplace?**
   ☐ Yes ☐ No
2. **Which PPE do you use?**
   ☐ Gloves ☐ Goggles ☐ Safety boots ☐ Face shield/welding helmet ☐ Apron/Overalls
   ☐ Earplugs
3. **How often do you wear PPE while performing your tasks?**

☐ Never ☐ Rarely ☐ Occasionally ☐ Frequently ☐ Always

1. **Have you received any training on occupational health and safety?**

☐ Yes ☐ No

**If Yes, how often do you receive safety training?**
☐ Once a month
☐ Once every 3 months
☐ Once a year
☐ Never

1. **Are there safety policies at your workplace?**
   ☐ Yes ☐ No ☐ Not sure
2. **What improvements would you recommend for a safer workplace?**


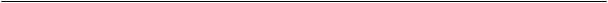


**Thank You**
